# Supplementary figures and images for: Short Rotation Intensive Culture of Willow, Spent Mushroom Substrate and Ramial Chipped Wood for Bioremediation of a Contaminated Site Used for Land Farming Activities of a Former Petrochemical Plant
Source: MDPI journal article supplement (doi:10.3390/plants10030520), 2021-03-10

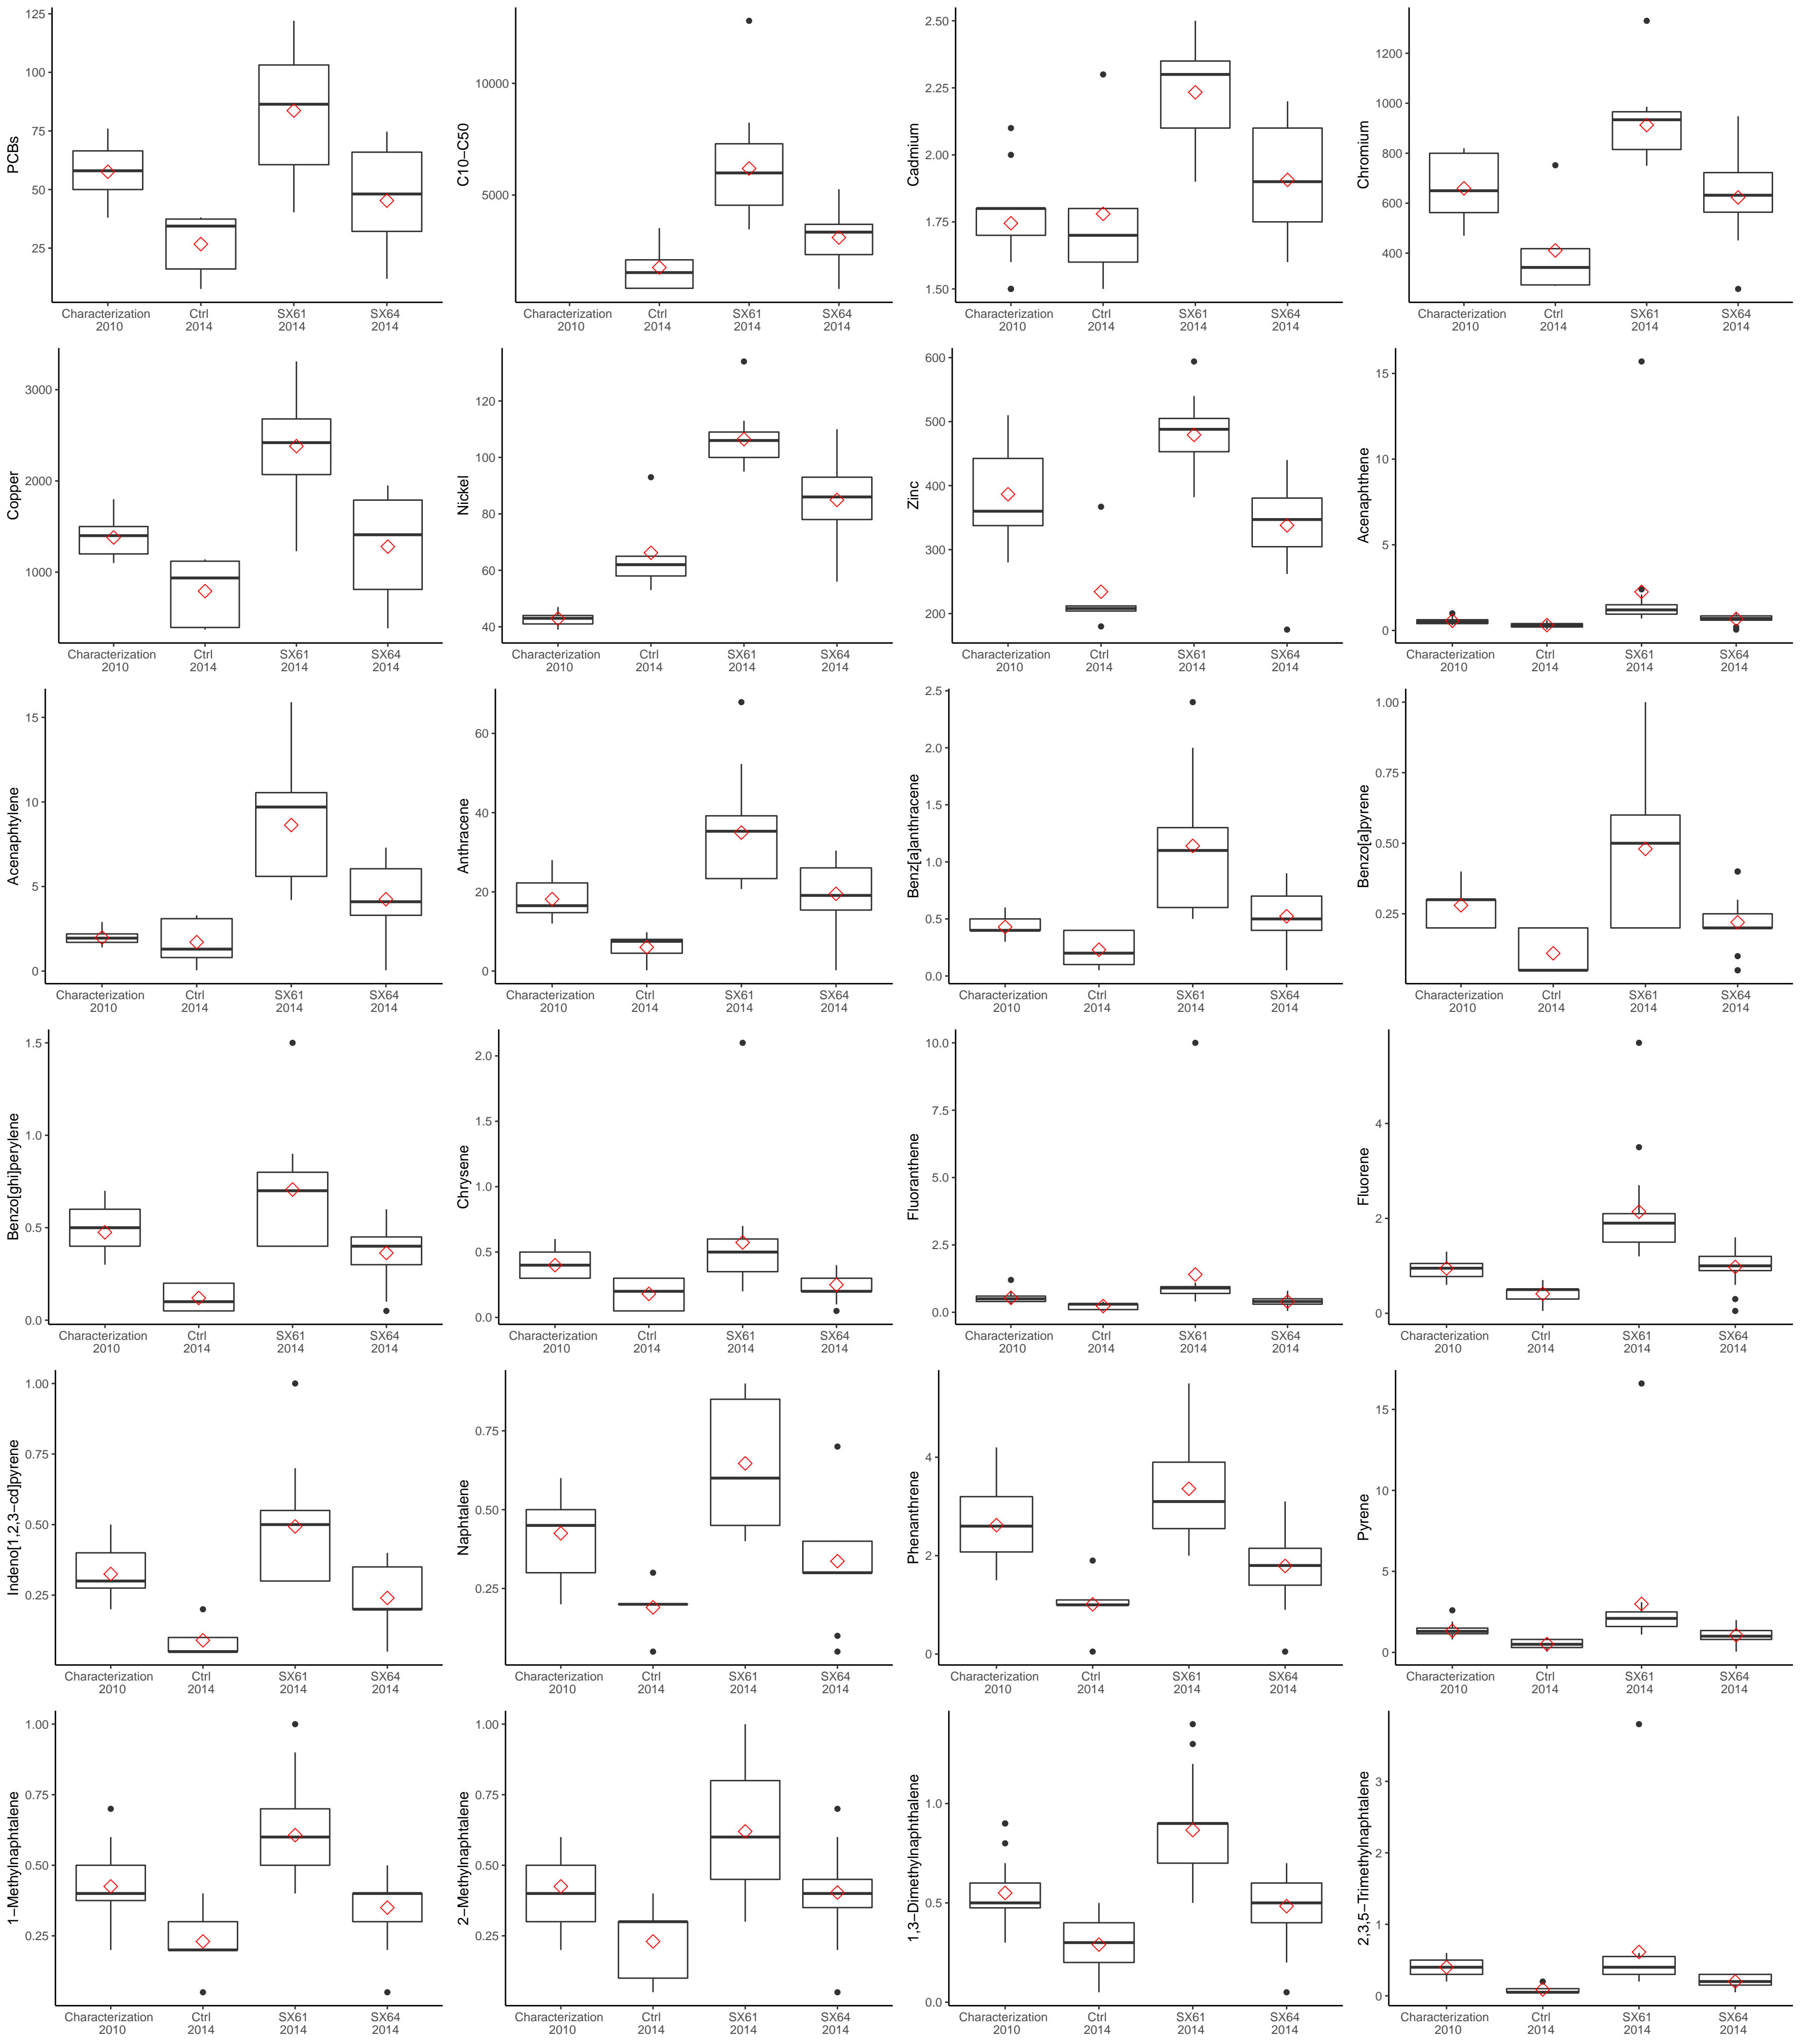

Supplement: s1 [file s1]
